# Supplementary material
Source: Research Square preprint supplement (doi:10.21203/rs.3.rs-9298789/v1)
Supplement: Supplementary file 2 [file d3e548fa3a1b2e9e31af613d.xlsx]

## Sheet: Sheet1
Site ID	Lat	Long	Elevation	Group	Lithology	Environment	Matter_lake	Survey_duration	Palaeolake	Molluscs	OES	Arefacts	Lithic_raw_material
1	17.9307	46.2876	751	gravel	siliciclastic	fluvial_alluvial		15
2	17.9317	46.2898	752	palaeolake_debris	limestone&gypcrete	fluvial_alluvial		5	x
3	17.9397	46.3004	752	gravel	siliciclastic	fluvial_alluvial	11.2	5
4	18.0656	46.4579	719	gravel	siliciclastic	fluvial_alluvial	11.2	5
5	18.0759	46.4712	706	gravel&dunes	siliciclastic	fluvial_alluvial	11.2	5
6	18.1452	46.5572	708	gravel	siliciclastic	fluvial_alluvial	11.2	5
7	18.1657	46.5841	698	palaeolake_debris	limestone&gypcrete	fluvial_alluvial	11.2	5
8	18.2441	46.7414	686	Wasia_Lower_Cretaceous	silicified_sandstone	bedrock_outcrop	C-3	30					x
9	18.2199	46.7788	675	Wasia_Lower_Cretaceous	silicified_sandstone	bedrock_outcrop	C-3	30					x
10	18.193	46.8488	665	palaeolake_debris	limestone&gypcrete	fluvial_alluvial		10	x
11	18.1922	46.8741	655	palaeolake_debris	limestone&gypcrete	fluvial_alluvial		30	x
12	18.1952	46.9157	655	gravel&dunes	siliciclastic	fluvial_alluvial_aeolian	12.2	driving
13	18.2424	47.0345	621	gravel&dunes	siliciclastic	fluvial_alluvial_aeolian	12.2	driving
14	18.2445	47.0434	627	gravel&dunes	siliciclastic	fluvial_alluvial_aeolian	12.2	driving
15	18.2338	47.0589	624	gravel&dunes	siliciclastic	fluvial_alluvial_aeolian	12.2	driving
16	18.3595	47.237	595	gravel&dunes	siliciclastic	fluvial_alluvial_aeolian	12.2	driving
18	18.3919	47.2849	592	gravel&dunes	siliciclastic	fluvial_alluvial_aeolian	12.2	driving
19	18.4114	47.299	585	gravel&dunes	siliciclastic	fluvial_alluvial_aeolian	12.2	driving
20	18.4499	47.35	577	gravel&dunes	siliciclastic	fluvial_alluvial_aeolian	I-3	driving
21	18.4934	47.3878	571	gravel&dunes	siliciclastic	fluvial_alluvial_aeolian	I-3	driving
22	18.5078	47.4034	561	gravel&dunes	siliciclastic	fluvial_alluvial_aeolian	I-3	driving
25	18.6486	47.579	540	gravel	siliciclastic	fluvial_alluvial	12.1	driving
26	18.6585	47.5897	535	gravel	siliciclastic	fluvial_alluvial	12.1	driving
27	18.6658	47.6009	535	gravel	siliciclastic	fluvial_alluvial	12.1	driving
28	18.6788	47.62	526	gravel	siliciclastic	fluvial_alluvial	15.3	driving
29	18.706	47.6594	522	gravel	siliciclastic	fluvial_alluvial	15.1	driving
30	18.7144	47.6701	524	gravel	siliciclastic	fluvial_alluvial	14.3	driving
31	18.7268	47.6868	517	oryx_horn	zoogenic	aeolian	14.3	driving
32	18.7403	47.7052	515	gravel	siliciclastic	fluvial_alluvial	14.3	driving
33	18.7511	47.7194	511	palaeolake	limestone&gypcrete	lacustrine_freshwater	11.2	20	x		x
34	18.7819	47.7605	505	gravel	siliciclastic	fluvial_alluvial	11.2	10	x
35	18.8046	47.7913	492	palaeolake	limestone&gypcrete	lacustrine_freshwater	11.2	driving	x
36	18.9366	47.9802	486	dune	siliciclastic	aeolian	C-3	driving	x
37	19.0317	48.13	451	palaeolake	limestone&gypcrete	lacustrine_freshwater	C-3	300	x		x
38	19.065	48.1833	443	palaeolake	limestone&gypcrete	lacustrine_freshwater	C-3	60	x	x
39	19.2428	48.4635	399	palaeolake	limestone&gypcrete	lacustrine_freshwater	12.2	60	x
40	19.25	48.4753	399	palaeolake	limestone&gypcrete	lacustrine_freshwater	12.2	60	x	x
41	19.2684	48.5038	397	gravel	siliciclastic	fluvial_alluvial	14.3	60
43	19.3692	48.6755	375	palaeolake	limestone&gypcrete	lacustrine_freshwater	12.2	60	x	x
44	19.3843	48.7039	373	palaeolake	limestone&gypcrete	lacustrine_freshwater	12.2	60	x	x
45	19.3975	48.7247	371	palaeolake	limestone&gypcrete	lacustrine_freshwater	12.2	300	x	x	x
46	19.4467	48.8217	351	palaeolake	limestone&gypcrete	lacustrine_freshwater	12.2	60	x	x
47	19.457	48.8387	352	palaeolake	limestone&gypcrete	lacustrine_freshwater	12.2	15	x	x	x
48	19.5372	49.0145	333	palaeolake	limestone&gypcrete	lacustrine_freshwater	I-3	120	x	x
49	19.5791	49.301	348	dune	siliciclastic	aeolian	14.3	10			x
50	19.5795	49.3112	335	palaeolake	limestone&gypcrete	lacustrine_freshwater	I-3	300	x	x	x
51	19.5743	49.1606	340	palaeolake	limestone&gypcrete	lacustrine_freshwater	I-3	300	x	x	x
52	19.5771	49.8232	285	palaeolake	limestone&gypcrete	lacustrine_freshwater	12.1	30	x	x	x
53	19.5226	50.0465	293	dune	siliciclastic	aeolian	14.3	30
54	19.499	50.1257	279	dune	siliciclastic	aeolian	14.3	30
55	19.5176	50.208	291	dune	siliciclastic	aeolian	14.3	30
56	19.5534	50.2836	268	dune	siliciclastic	aeolian	14.3	30
57	19.5432	50.3542	274	dune	siliciclastic	aeolian	14.3	30
58	19.5461	50.3681	269	palaeolake	limestone&gypcrete	lacustrine_freshwater	12.1	10	x
59	19.5438	50.3671	252	palaeolake	limestone&gypcrete	lacustrine_freshwater	12.1	10	x
60	19.5217	50.407	272	dune	siliciclastic	aeolian	14.3	10
61	19.5454	50.6905	252	palaeolake	limestone&gypcrete	lacustrine_freshwater	15.3	10	x	x
62	19.5845	50.7819	238	palaeolake	limestone&gypcrete	lacustrine_freshwater	15.1	120	x	x
63	19.6669	50.9399	236	palaeolake	limestone&gypcrete	lacustrine_freshwater	14.3	120	x	x
64	19.7093	51.0136	218	palaeolake	dolomite&gypsum_microbialites	lacustrine_microbial_build_ups	14.3	120	x
65	19.7208	51.0445	224	palaeolake	dolomite&gypsum_microbialites	lacustrine_microbial_build_ups	14.3	30	x
66	20.2083	51.8668	155	palaeolake	dolomite&gypsum_microbialites	lacustrine_microbial_build_ups		30	x
67	20.2699	52.0147	155	palaeolake	dolomite&gypsum_microbialites	lacustrine_microbial_build_ups		30	x
68	20.313	52.0675	146	palaeolake	dolomite&gypsum_microbialites	lacustrine_microbial_build_ups		driving	x
69	20.3149	52.0634	141	palaeo_watertable	consolidated_aeolian_sands	aeolian_exhumation_of_capilary_zone		60	x
70	20.3136	52.0579	149	palaeo_watertable	consolidated_aeolian_sands	aeolian_exhumation_of_capilary_zone		300	x
71	19.7724	53.9867	150	palaeo_watertable	consolidated_aeolian_sands	aeolian_exhumation_of_capilary_zone		300	x
72	20.3186	52.0557	148	palaeolake	dolomite&gypsum_microbialites	lacustrine_microbial_build_ups		300	x
73	20.3032	52.2072	142	palaeolake	dolomite&gypsum_microbialites	lacustrine_microbial_build_ups		driving	x
74	20.3136	52.283	148	palaeolake	dolomite&gypsum_microbialites	lacustrine_microbial_build_ups		driving	x
75	20.3331	52.3341	161	palaeolake	dolomite&gypsum_microbialites	lacustrine_microbial_build_ups		driving	x
76	20.3291	52.3313	145	palaeolake	dolomite&gypsum_microbialites	lacustrine_microbial_build_ups		driving	x
77	20.3014	52.4068	150	palaeolake	dolomite&gypsum_microbialites	lacustrine_microbial_build_ups		driving	x
78	20.2994	52.4044	138	palaeolake	dolomite&gypsum_microbialites	lacustrine_microbial_build_ups		driving	x
79	20.2966	52.4006	150	palaeolake	dolomite&gypsum_microbialites	lacustrine_microbial_build_ups		120	x
80	20.2988	52.4025	142	palaeolake	dolomite&gypsum_microbialites	lacustrine_microbial_build_ups		120	x
81	20.2993	52.4053	142	palaeolake	dolomite&gypsum_microbialites	lacustrine_microbial_build_ups		120	x
82	20.2994	52.4064	150	palaeolake	dolomite&gypsum_microbialites	lacustrine_microbial_build_ups		90	x
83	20.2913	52.4275	140	palaeolake	dolomite&gypsum_microbialites	lacustrine_microbial_build_ups		driving	x
84	20.297	52.454	151	palaeolake	dolomite&gypsum_microbialites	lacustrine_microbial_build_ups		driving	x
85	20.2952	52.5011	147	palaeolake	dolomite&gypsum_microbialites	lacustrine_microbial_build_ups		driving	x
86	20.3142	52.6939	127	palaeolake	dolomite&gypsum_microbialites	lacustrine_microbial_build_ups		300	x
87	20.329	52.7121	153	palaeolake	dolomite&gypsum_microbialites	lacustrine_microbial_build_ups		120	x
88	20.318	52.8717	121	palaeolake	dolomite&gypsum_microbialites	lacustrine_microbial_build_ups		120	x
89	20.3434	53.2556	118	palaeolake	dolomite&gypsum_microbialites	lacustrine_microbial_build_ups		5	x
90	20.3349	53.2688	118	palaeolake	dolomite&gypsum_microbialites	lacustrine_microbial_build_ups		driving	x
91	20.3316	53.2971	110	palaeolake	dolomite&gypsum_microbialites	lacustrine_microbial_build_ups		30	x
92	20.3382	53.3394	105	palaeolake	dolomite&gypsum_microbialites	lacustrine_microbial_build_ups		driving	x
93	20.3387	53.3482	107	palaeolake	dolomite&gypsum_microbialites	lacustrine_microbial_build_ups		15
94	20.3303	53.3719	105	active_saltlakes	evaporites	sabkha		driving
95	20.3398	53.3973	105	active_saltlakes	evaporites	sabkha		120
96	20.3052	53.412	102	active_saltlakes	evaporites	sabkha		90
97	20.2797	53.4693	105	active_saltlakes	evaporites	sabkha		90
98	20.2619	53.501	100	active_saltlakes	evaporites	sabkha		90
99	20.2297	53.675	98	active_saltlakes	evaporites	sabkha		90
100	20.2848	53.7062	97	active_saltlakes	evaporites	sabkha		90
101	20.3093	53.6788	96	active_saltlakes	evaporites	sabkha		240
102	20.3432	53.6834	99	active_saltlakes	evaporites	sabkha		90
103	20.3244	53.7969	94	active_saltlakes	evaporites	sabkha		240
104	20.418	53.9358	87	active_saltlakes	evaporites	sabkha		240
105	20.4386	53.9813	86	active_saltlakes	evaporites	sabkha		driving
106	20.513	54.2636	92	active_saltlakes	evaporites	sabkha		240
107	20.7173	54.7257	75	gravel&debris	carbonatic	alluvial		10					x
108	20.7194	54.727	78	dune	siliciclastic	aeolian		360
109	20.7267	54.8225	80	gravel&debris	carbonatic	alluvial		90					x
110	20.7351	54.7289	70	gravel&debris	carbonatic	alluvial		90					x
111	20.7601	54.9285	86	Dammam_Eocene	carbonates	bedrock_outcrop		5					x
112	20.9719	55.1407	80	gravel&debris	carbonatic	alluvial		driving					x
113	21.045	55.1574	79	gravel&debris	carbonatic	alluvial		driving					x
114	21.0782	55.1437	80	gravel&debris	carbonatic	alluvial		driving					x
115	21.1071	55.155	78	gravel&debris	carbonatic	alluvial		driving					x
116	21.1661	55.1205	74	palaeolake	bioturbated_sst&claystone	lacustrine_freshwater		90	x
117	21.3426	55.1187	69	gravel_on_active_saltlakes	evaporites	sabkha		60
118	21.3588	55.1165	79	gravel_on_active_saltlakes	evaporites	sabkha		driving
119	21.5776	55.1828	87	gravel_on_active_saltlakes	evaporites	sabkha		driving
120	21.7025	55.2703	62	Umm_as_Samim	evaporites	sabkha		15
121	21.7435	55.34	59	Umm_as_Samim	evaporites	sabkha		driving
122	21.8938	55.5048	54	Umm_as_Samim	evaporites	sabkha		15
123	21.9151	55.5114	54	Umm_as_Samim	evaporites	sabkha		60
124	22.0743	55.492	62	Al_Batinah_plain	siliciclastic	Quaternary_distal_fan		60
125	22.0893	55.4669	60	Al_Batinah_plain	siliciclastic	Quaternary_distal_fan		30
126	22.1241	55.4737	70	Al_Batinah_plain	siliciclastic	Quaternary_distal_fan		30
127	22.144	55.462	63	Al_Batinah_plain	siliciclastic	Quaternary_distal_fan		30
128	22.1241	55.4737	70	Al_Batinah_plain	siliciclastic	Quaternary_distal_fan		30
129	22.144	55.462	63	Al_Batinah_plain	siliciclastic	Quaternary_distal_fan		30
